# Supplementary material
Source: PubMed Central journal article supplement (PMC4439327)
Supplement: NIHMS659608-supplement-supplement_1.pdf [file NIHMS659608-supplement-supplement_1.pdf]

**Supplementary Table 1: Mitochondrial Electron Transport Defects in Platelets of Parkinson's Disease Subjects**

| <b>Study</b>               | <b>Results</b>      | <b>N</b> | <b>Preparation</b> |
|----------------------------|---------------------|----------|--------------------|
| Parker et al (1989) (29)   | -54% complex I      | 10       | m                  |
| Mann et al (1992) (30)     | No difference       | 14       | c                  |
| Bravi et al (1992) (31)    | No difference       | 17       | m                  |
| Yoshino et al (1992) (11)  | -26% complex I      |          |                    |
|                            | -20% complex II     | 20       | c                  |
| Krige et al (1992) (32)    | -16% complex I      | 25       | m                  |
| Benecke et al (1993) (33)  | -52% complex I      |          |                    |
|                            | -30% complex IV     | 27       | m                  |
| Haas et al (1995) (5)      | -25% complex I      |          |                    |
|                            | -20% complex II/III |          |                    |
|                            | No difference       | 13       | m                  |
|                            | complex IV          |          |                    |
| Blake et al (1997) (34)    | No difference       | 13       | c                  |
| Hanagasi et al (2005) (35) | No difference       | 22       | c                  |
| Varghese et al (2009) (36) | -50% complex I      | 10       | c                  |

m = ETC activity measured in isolated mitochondria. C = ETC activity measured in crude homogenates.

**Supplementary Table 3: Demographics of Subjects and Exposure to Mitochondrial Inhibiting Pesticides**

| Variable                              | Mitochondrial Complex I Inhibitors |               |          |
|---------------------------------------|------------------------------------|---------------|----------|
|                                       | Unexposed (n=37)                   | Exposed (n=9) | p-value* |
| <b><i>Demographics</i></b>            |                                    |               |          |
| Age (mean $\pm$ SD)                   | 70.8 (9.7)                         | 70.6 (14.6)   | 0.95     |
| Female (%)                            | 51.4                               | 66.7          | 0.41     |
| Never Smokers (%)                     | 40.5                               | 44.4          | 0.77     |
| Non-Caucasian (%)                     | 16.2                               | 11.1          | -        |
| <b><i>Health Indicators</i></b>       |                                    |               |          |
| MMSE score (mean $\pm$ SD)            | 27.8 (3.4)                         | 28.6 (1.2)    | 0.29     |
| <b><i>Mitochondrial Function:</i></b> |                                    |               |          |
| Complex I (CI) (mean $\pm$ SD)        | 15.6 (9.0)                         | 14.5 (7.7)    | 0.72     |
| Citrate synthase (CS) (mean $\pm$ SD) | 394.0 (185.7)                      | 354.0 (214.4) | 0.58     |
| CI/CS (mean $\pm$ SD)                 | 0.041 (0.01)                       | 0.048 (0.02)  | 0.18     |
| NCCR (mean $\pm$ SD)†                 | 34.0 (22.5)                        | 22.9 (15.3)   | 0.19     |
| NCCR/CS (mean $\pm$ SD)†              | 0.081 (0.03)                       | 0.056 (0.02)  | 0.03     |

\*P-value based on ttest or chi-square, Exposed vs Unexposed.

† 1 additional PD case and 1 control failed NCCR experiment (n=44).

**Supplementary Table 4: Exposure by Pesticide Class**

| <b>Pesticide Exposure<br/>Class</b>           | <b>Exposure within 5 year of biologic sample draw</b> |                  |                              |
|-----------------------------------------------|-------------------------------------------------------|------------------|------------------------------|
|                                               | <b>Exposed</b>                                        | <b>Unexposed</b> | <b>Median # of chemicals</b> |
|                                               | <b>n (%)</b>                                          | <b>n (%)</b>     | <b>exposed to (range)</b>    |
| <b>Any Pesticide</b>                          | 25<br>(54.4)                                          | 21 (46.7)        | 26 (1-130)                   |
| <b>Organophosphates</b>                       | 19<br>(41.3)                                          | 27 (58.7)        | 4 (1-9)                      |
| <b>Organochlorines</b>                        | 13<br>(28.3)                                          | 33 (71.7)        | 1 (1-3)                      |
| <b>Dithiocarbamates</b>                       | 11<br>(23.9)                                          | 35 (76.1)        | 1 (1-3)                      |
| <b>Mitochondrial<br/>Complex I Inhibitors</b> | 9 (19.6)                                              | 37 (80.4)        | 1 (1-3)                      |

**Supplementary Table 5: PD Medications at Time of Enrollment**

| Medication                         | Dose   | Pills / day | PD Patients n (%) |
|------------------------------------|--------|-------------|-------------------|
| Amantadine                         | 100 mg | 2           | 1 (2.1)           |
| Artane                             | 2 mg   | 4           | 1 (2.1)           |
| Carbidopa/levodopa                 | 10/100 | 3           | 1 (2.1)           |
|                                    | 25/100 | 2-4         | 10 (21.3)         |
|                                    | 25/250 | 3           | 1 (2.1)           |
| Carbidopa/levodopa (CR, ER, or XR) | 25/100 | 2-3         | 2 (4.3)           |
|                                    | 50/200 | 1-4         | 6 (12.8)          |
| Mirapex                            | 5 mg   | 3           | 1 (2.1)           |
|                                    | 25 mg  | 1           | 1 (2.1)           |
|                                    | 125 mg | 3           | 2 (4.3)           |
| Permax                             | 1 mg   | 2-3         | 3 (6.4)           |
|                                    | 5 mg   | 4           | 1 (2.1)           |
| Requip                             | 1 mg   | 2           | 1 (2.1)           |
|                                    | 4 mg   | 3           | 1 (2.1)           |
| Selegeline                         | 5 mg   | 2           | 2 (4.3)           |

\*NOTE participants may be taking more than one medication and included in more than one category above

**Supplementary Table 6: All Non-PD Medications at Time of Enrollment**

| Medication                                | Controls<br>n=23 | PD<br>Patients<br>n=23 |
|-------------------------------------------|------------------|------------------------|
| <b>Acetaminophen, n (%)</b>               | 1 (0.04)         | 2 (0.09)               |
| <b>Aspirin</b>                            | 3 (0.13)         | 3 (0.13)               |
| <b>Other pain medications</b>             | 5 (0.21)         | 5 (0.22)               |
| <b>Anxiety Medications</b>                |                  |                        |
| <i>Chlordiazepoxide</i>                   | 0                | 1 (0.04)               |
| <b>Blood Pressure Medications</b>         |                  |                        |
| <i>Amlodipine</i>                         | 1 (0.04)         | 0                      |
| <i>Atenolol</i>                           | 2 (0.09)         | 0                      |
| <i>Captopril</i>                          | 0                | 1 (0.04)               |
| <i>Diltiazem</i>                          | 1 (0.04)         | 0                      |
| <i>Enalapril</i>                          | 0                | 2 (0.09)               |
| <i>Furosemide</i>                         | 1 (0.04)         | 0                      |
| <i>Hydrochlorothiazide</i>                | 0                | 1 (0.04)               |
| <i>Irbesartan and Hydrochlorothiazide</i> | 1 (0.04)         | 0                      |
| <i>Lisinopril</i>                         | 2 (0.09)         | 2 (0.09)               |
| <i>Lisinopril and Hydrochlorothiazide</i> | 1 (0.04)         | 0                      |
| <i>Metoprolol</i>                         | 1 (0.04)         | 0                      |
| <i>Nifedipine</i>                         | 1 (0.04)         | 0                      |
| <i>Propranolol</i>                        | 0                | 1 (0.04)               |
| <i>Terazosin</i>                          | 1 (0.04)         | 0                      |
| <i>Valsartan and Hydrochlorothiazide</i>  | 1 (0.04)         | 0                      |
| <b>Depression Medications</b>             |                  |                        |
| <i>Bupropion</i>                          | 1 (0.04)         | 1 (0.04)               |
| <i>Paroxetine</i>                         | 2 (0.09)         | 0                      |
| <i>Imipramine</i>                         | 0                | 1 (0.04)               |
| <i>Fluoxetine</i>                         | 1 (0.04)         | 0                      |
| <b>Diabetes Medications</b>               |                  |                        |
| <i>Glipizide</i>                          | 1 (0.04)         | 0                      |
| <i>Glyburide</i>                          | 0                | 1 (0.04)               |
| <i>Pioglitazone</i>                       | 1 (0.04)         | 0                      |
| <b>Other Medications</b>                  |                  |                        |
| <i>Alendronate</i>                        | 2 (0.09)         | 1 (0.04)               |
| <i>Atorvastatin</i>                       | 1 (0.04)         | 0                      |
| <i>Coumadin</i>                           | 1 (0.04)         | 0                      |
| <i>Clopidogrel</i>                        | 0                | 1 (0.04)               |
| <i>Diazepam</i>                           | 1 (0.04)         | 0                      |
| <i>Digoxin</i>                            | 1 (0.04)         | 0                      |
| <i>Fexofenadine</i>                       | 1 (0.04)         | 1 (0.04)               |
| <i>Levothyroxine</i>                      | 1 (0.04)         | 2 (0.09)               |
| <i>Lovastatin</i>                         | 1 (0.04)         | 0                      |

|                           |          |          |
|---------------------------|----------|----------|
| <i>Minocycline</i>        | 0        | 1 (0.04) |
| <i>Ofloxacin Otic</i>     | 1 (0.04) | 0        |
| <i>Potassium Chloride</i> | 1 (0.04) | 0        |
| <i>Propafenone</i>        | 1 (0.04) | 0        |
| <i>Ranitidine</i>         | 1 (0.04) | 0        |
| <i>Spironolactone</i>     | 0        | 1 (0.04) |

---

\*NOTE participants may be taking more than one medication and included in more than one category above
